# Supplementary material for: Emerging Disparities in Dietary Sodium Intake from Snacking in the US Population
Source: MDPI journal article supplement (doi:10.3390/nu9060610), 2017-06-17
Supplement: s1 [file s1]

**Supplementary Table 1: Sociodemographic characteristics for US adults and children from the 1977–1978 Nationwide Food Consumption Survey (NFCS); the 1989–1991 Continuing Survey of Food Intake by Individuals (CSFII), the 1994–1996 CSFII, the 1997-1998 CSFII, NHANES 2003–2004, NHANES 2005– 2006, NHANES 2009-10 and NHANES 2011-14.**

|                                                  | NFCS 1977-78 |        | CSFII 1989-91 |        | CSFII 1994-98 |        | NHANES 2003-06 |        | NHANES 2011-14 |        |
|--------------------------------------------------|--------------|--------|---------------|--------|---------------|--------|----------------|--------|----------------|--------|
|                                                  | Children     | Adults | Children      | Adults | Children      | Adults | Children       | Adults | Children       | Adults |
| Number of observations                           | 14,363       | 29,065 | 5,863         | 11,877 | 11,643        | 10,019 | 9,893          | 10,577 | 8,290          | 11,641 |
| % Male                                           | 50.3         | 46.4   | 51.2          | 43.7   | 50.3          | 51.2   | 50.2           | 48.1   | 50.9           | 48.5   |
| Race-ethnic status:                              |              |        |               |        |               |        |                |        |                |        |
| Hispanic (%)                                     | 8            | 5      | 15            | 9      | 17            | 9      | 36             | 24     | 32             | 21     |
| Non-Hispanic white (%)                           | 76           | 84     | 66            | 78     | 66            | 79     | 28             | 50     | 25             | 39     |
| Non-Hispanic black (%)                           | 15           | 11     | 20            | 13     | 15            | 11     | 31             | 22     | 27             | 23     |
| Income as % poverty                              |              |        |               |        |               |        |                |        |                |        |
| <185% federal poverty level (%)                  | 39           | 29     | 67            | 52     | 47            | 35     | 55             | 40     | 61             | 48     |
| 185-350 % federal poverty level (%)              | 40           | 37     | 22            | 24     | 28            | 28     | 22             | 25     | 19             | 22     |
| >350% federal poverty level (%)                  | 21           | 34     | 11            | 24     | 25            | 37     | 24             | 26     | 20             | 30     |
| Body mass index                                  |              |        |               |        |               |        |                |        |                |        |
| Underweight (%)                                  | 43           | 4      | 45            | 4      | 57            | 2      | 44             | 2      | 53             | 2      |
| Normal weight (%)                                | 46           | 57     | 40            | 48     | 33            | 46     | 37             | 31     | 32             | 30     |
| Overweight (%)                                   | 7            | 29     | 9             | 33     | 7             | 36     | 11             | 34     | 9              | 32     |
| Obese (%)                                        | 4            | 10     | 6             | 16     | 4             | 19     | 8              | 34     | 6              | 36     |
| Education household head                         |              |        |               |        |               |        |                |        |                |        |
| Household's education <= high school diploma (%) | 23           | 24     | 26            | 31     | 13            | 21     | 33             | 29     | 25             | 23     |
| Household's education = high school diploma (%)  | 38           | 34     | 35            | 37     | 29            | 35     | 25             | 25     | 23             | 22     |
| Household's education >= high school diploma (%) | 40           | 41     | 39            | 32     | 58            | 44     | 42             | 46     | 52             | 55     |

**Supplementary Table 2: Number of snacks consumed per day, percentage snackers in the population and sodium consumed per snacking occasion by US children and adults from the 1977-78, 1989-91, 1994-98, 2003-06 and 2011-14 surveys by BMI**

|                              | Children                |                         |                         |                         |            | Adults                  |                         |                         |             |            |
|------------------------------|-------------------------|-------------------------|-------------------------|-------------------------|------------|-------------------------|-------------------------|-------------------------|-------------|------------|
|                              | 1977-78                 | 1989-91                 | 1994-98                 | 2003-06                 | 2011-14    | 1977-78                 | 1989-91                 | 1994-98                 | 2003-06     | 2011-14    |
| <b>Underweight</b>           |                         |                         |                         |                         |            |                         |                         |                         |             |            |
| Snacks, n/d                  | 1.2 (.03)               | 1.4 (.08)               | 2.4 (.05)               | 2.8 (.07)               | 2.7 (.06)  | 1.1 (.07)               | 1.2 (.07)               | 1.3 (.11)               | 2.3 (.14)   | 2.4 (.15)  |
| Total sodium from snacks, mg | 209 (7.7) <sup>1</sup>  | 250 (19.6) <sup>1</sup> | 425 (19.8)              | 529 (18) <sup>1</sup>   | 460 (16)   | 196 (23.6) <sup>1</sup> | 208 (25.3) <sup>1</sup> | 329 (57.3) <sup>2</sup> | 638 (123.3) | 539 (60)   |
| % snackers                   | 64 (1.3)                | 66 (2.4)                | 86 (1.2)                | 95 (.6)                 | 95 (.8)    | 57 (2.5)                | 65 (2.8)                | 68 (3.6)                | 89 (2.7)    | 86 (3.7)   |
| Sodium per snack, mg         | 324 (9.5) <sup>1</sup>  | 377 (25.2) <sup>1</sup> | 492 (18.7) <sup>1</sup> | 560 (18.6) <sup>1</sup> | 486 (17.5) | 345 (38.2) <sup>1</sup> | 320 (37.3) <sup>1</sup> | 482 (76)                | 718 (145.2) | 625 (63.7) |
| <b>Normal weight</b>         |                         |                         |                         |                         |            |                         |                         |                         |             |            |
| Snacks, n/d                  | 1.0 (.03)               | 1.3 (.06)               | 1.9 (.05)               | 2.5 (.06)               | 2.3 (.06)  | 1.1 (.03)               | 1.3 (.05)               | 1.6 (.04)               | 2.4 (.05)   | 2.4 (.07)  |
| Total sodium from snacks, mg | 284 (11.7) <sup>1</sup> | 333 (28) <sup>1</sup>   | 526 (28.8)              | 634 (28.3) <sup>1</sup> | 489 (23.9) | 202 (6.1) <sup>1</sup>  | 240 (11.5) <sup>1</sup> | 363 (14.9) <sup>1</sup> | 496 (29.1)  | 444 (21.2) |
| % snackers                   | 60 (1.3)                | 66 (2.3)                | 82 (1.3)                | 91 (.8)                 | 91 (.9)    | 59 (1.1)                | 62 (1.5)                | 74 (1.2)                | 89 (1)      | 90 (.9)    |
| Sodium per snack, mg         | 475 (16.6) <sup>2</sup> | 507 (37.6)              | 645 (29.1)              | 696 (30.5) <sup>1</sup> | 538 (26.5) | 339 (7.9) <sup>1</sup>  | 384 (15.2) <sup>1</sup> | 493 (16.7)              | 555 (32.2)  | 495 (21.6) |
| <b>Overweight</b>            |                         |                         |                         |                         |            |                         |                         |                         |             |            |
| Snacks, n/d                  | 0.9 (.04)               | 1.1 (.1)                | 1.7 (.07)               | 2.2 (.08)               | 2.0 (.1)   | 1.0 (.03)               | 1.2 (.06)               | 1.5 (.04)               | 2.3 (.05)   | 2.4 (.05)  |
| Total sodium from snacks, mg | 223 (17) <sup>1</sup>   | 236 (31.7) <sup>1</sup> | 500 (54.3)              | 500 (39.3)              | 471 (56.8) | 186 (8.1) <sup>1</sup>  | 215 (12.9) <sup>1</sup> | 337 (13.1) <sup>1</sup> | 435 (17.8)  | 412 (16.8) |
| % snackers                   | 54 (2.3)                | 60 (4)                  | 73 (2.7)                | 89 (1.8)                | 85 (3)     | 55 (1.4)                | 61 (1.8)                | 71 (1.1)                | 88 (.7)     | 88 (1)     |
| Sodium per snack, mg         | 415 (27.1)              | 395 (44.7) <sup>2</sup> | 681 (67.2)              | 563 (41.5)              | 551 (63.3) | 337 (10.4) <sup>1</sup> | 350 (17.5) <sup>1</sup> | 477 (17.1)              | 493 (18.6)  | 466 (18)   |
| <b>Obese</b>                 |                         |                         |                         |                         |            |                         |                         |                         |             |            |
| Snacks, n/d                  | 1.0 (.08)               | 1.2 (.12)               | 1.8 (.13)               | 2.0 (.07)               | 2.1 (.13)  | 0.9 (.04)               | 1.2 (.06)               | 1.4 (.05)               | 2.2 (.07)   | 2.3 (.06)  |
| Total sodium from snacks, mg | 207 (23.8) <sup>1</sup> | 243 (50.8) <sup>1</sup> | 368 (55.5)              | 411 (31.1)              | 463 (45.5) | 173 (12.8) <sup>1</sup> | 222 (16.1) <sup>1</sup> | 350 (19.6) <sup>1</sup> | 415 (19.6)  | 414 (13.4) |
| % snackers                   | 56 (3.6)                | 63 (5.3)                | 73 (3.9)                | 90 (2.1)                | 87 (2.3)   | 52 (1.9)                | 60 (2.4)                | 71 (1.6)                | 88 (.9)     | 88 (1)     |

|                      |                         |            |            |            |            |                         |                         |            |          |            |
|----------------------|-------------------------|------------|------------|------------|------------|-------------------------|-------------------------|------------|----------|------------|
| Sodium per snack, mg | 372 (41.6) <sup>2</sup> | 387 (75.1) | 503 (65.8) | 454 (32.4) | 533 (56.2) | 333 (20.9) <sup>1</sup> | 368 (21.7) <sup>1</sup> | 491 (23.1) | 470 (21) | 471 (15.5) |
|----------------------|-------------------------|------------|------------|------------|------------|-------------------------|-------------------------|------------|----------|------------|

**Supplementary Table 3: Top 10 sources of sodium intake from snack foods in US adults overall and by race-ethnic group**

|                 | 1977-78                             | 1989-91                     | 1994-98                             | 2003-06                             | 2011-14                             |
|-----------------|-------------------------------------|-----------------------------|-------------------------------------|-------------------------------------|-------------------------------------|
| <b>Overall</b>  |                                     |                             |                                     |                                     |                                     |
| 1               | Grain-based desserts                | Salty snacks                | Salty snacks                        | Salty snacks                        | Grain-based desserts                |
| 2               | Salty snacks                        | Grain-based desserts        | Grain-based desserts                | Grain-based desserts                | Salty snacks                        |
| 3               | Processed meats and poultry         | Breads and rolls            | Processed meats and poultry         | Processed meats and poultry         | Processed meats and poultry         |
| 4               | Breads and rolls                    | Fluid milk                  | Breads and rolls                    | Breads and rolls                    | Tortilla and corn-based dishes      |
| 5               | Cheese & cheese products            | Cheese & cheese products    | Cheese & cheese products            | Cheese & cheese products            | Cheese & cheese products            |
| 6               | Fluid milk                          | Processed meats and poultry | Dairy-based desserts                | Pizza & calzone                     | Breads and rolls                    |
| 7               | Dairy-based desserts                | Dairy-based desserts        | Fluid milk                          | Tortilla and corn-based dishes      | Nuts, nut butters, seeds, & coconut |
| 8               | Soups & stews                       | Soups & stews               | Pizza & calzone                     | Fluid milk                          | Dairy-based desserts                |
| 9               | Nuts, nut butters, seeds, & coconut | Pizza & calzone             | Soups & stews                       | Dairy-based desserts                | Fluid milk                          |
| 10              | Coffee/tea                          | Sugar sweetened beverages   | Nuts, nut butters, seeds, & coconut | Nuts, nut butters, seeds, & coconut | Sandwiches & filled rolls           |
| <b>Hispanic</b> |                                     |                             |                                     |                                     |                                     |
| 1               | Grain-based desserts                | Grain-based desserts        | Grain-based desserts                | Grain-based desserts                | Grain-based desserts                |
| 2               | Processed meats and poultry         | Salty snacks                | Salty snacks                        | Salty snacks                        | Tortilla and corn-based dishes      |
| 3               | Breads and rolls                    | Fluid milk                  | Processed meats and poultry         | Tortilla and corn-based dishes      | Salty snacks                        |
| 4               | Fluid milk                          | Cheese & cheese products    | Rice and other grains and dishes    | Processed meats and poultry         | Cheese & cheese products            |
| 5               | Salty snacks                        | Processed meats and poultry | Fluid milk                          | Breads and rolls                    | Breads and rolls                    |
| 6               | Cheese & cheese products            | Breads and rolls            | Breads and rolls                    | Fluid milk                          | Processed meats and poultry         |

|                    |    |                                     |                                     |                                     |                                     |                                     |
|--------------------|----|-------------------------------------|-------------------------------------|-------------------------------------|-------------------------------------|-------------------------------------|
| Non-Hispanic White | 7  | Rice and other grains and dishes    | Soups & stews                       | Tortilla and corn-based dishes      | Pizza & calzone                     | Fluid milk                          |
|                    | 8  | Coffee/tea                          | Dips & spreads                      | Sandwiches & filled rolls           | Soups & stews                       | Pizza & calzone                     |
|                    | 9  | Dairy-based desserts                | Coffee/tea                          | Soups & stews                       | Cheese & cheese products            | Soups & stews                       |
|                    | 10 | Nuts, nut butters, seeds, & coconut | Tortilla and corn-based dishes      | Meat                                | Nuts, nut butters, seeds, & coconut | Dairy-based desserts                |
|                    | 1  | Grain-based desserts                | Salty snacks                        | Salty snacks                        | Salty snacks                        | Grain-based desserts                |
|                    | 2  | Salty snacks                        | Grain-based desserts                | Grain-based desserts                | Grain-based desserts                | Salty snacks                        |
|                    | 3  | Processed meats and poultry         | Fluid milk                          | Processed meats and poultry         | Cheese & cheese products            | Cheese & cheese products            |
|                    | 4  | Breads and rolls                    | Breads and rolls                    | Breads and rolls                    | Processed meats and poultry         | Processed meats and poultry         |
|                    | 5  | Cheese & cheese products            | Cheese & cheese products            | Cheese & cheese products            | Breads and rolls                    | Breads and rolls                    |
|                    | 6  | Fluid milk                          | Dairy-based desserts                | Dairy-based desserts                | Dairy-based desserts                | Nuts, nut butters, seeds, & coconut |
| Non-Hispanic Black | 7  | Dairy-based desserts                | Soups & stews                       | Fluid milk                          | Pizza & calzone                     | Fluid milk                          |
|                    | 8  | Nuts, nut butters, seeds, & coconut | Processed meats and poultry         | Nuts, nut butters, seeds, & coconut | Fluid milk                          | Dairy-based desserts                |
|                    | 9  | Soups & stews                       | Pizza & calzone                     | Soups & stews                       | Tortilla and corn-based dishes      | Tortilla and corn-based dishes      |
|                    | 10 | Coffee/tea                          | Nuts, nut butters, seeds, & coconut | Sugar sweetened beverages           | Nuts, nut butters, seeds, & coconut | Pizza & calzone                     |
|                    | 1  | Processed meats and poultry         | Salty snacks                        | Grain-based desserts                | Salty snacks                        | Grain-based desserts                |
|                    | 2  | Grain-based desserts                | Grain-based desserts                | Salty snacks                        | Grain-based desserts                | Salty snacks                        |
|                    | 3  | Breads and rolls                    | Processed meats and poultry         | Processed meats and poultry         | Processed meats and poultry         | Processed meats and poultry         |

|    |                           |                           |                           |                                |                                |
|----|---------------------------|---------------------------|---------------------------|--------------------------------|--------------------------------|
| 4  | Sandwiches & filled rolls | Breads and rolls          | Pizza & calzone           | Breads and rolls               | Breads and rolls               |
| 5  | Meat                      | Meat                      | Breads and rolls          | Pizza & calzone                | Sandwiches & filled rolls      |
| 6  | Salty snacks              | Dairy-based desserts      | Poultry                   | Cheese & cheese products       | Cheese & cheese products       |
| 7  | Cheese & cheese products  | Soups & stews             | Meat                      | Poultry                        | Poultry                        |
| 8  | Fluid milk                | Fluid milk                | Sugar sweetened beverages | Tortilla and corn-based dishes | Tortilla and corn-based dishes |
| 9  | Soups & stews             | Sugar sweetened beverages | Dairy-based desserts      | Sandwiches & filled rolls      | Pizza & calzone                |
| 10 | Dairy-based desserts      | Poultry                   | Cheese & cheese products  | Meat                           | Dairy-based desserts           |

---

**Supplementary Table 4: Top 10 sources of sodium intake from snack foods in US children overall and by race-ethnic group**

|                 | 1977-78                     | 1989-91                     | 1994-98                         | 2003-06                        | 2011-14                        |
|-----------------|-----------------------------|-----------------------------|---------------------------------|--------------------------------|--------------------------------|
| <b>Overall</b>  |                             |                             |                                 |                                |                                |
| 1               | Grain-based desserts        | Salty snacks                | Salty snacks                    | Salty snacks                   | Salty snacks                   |
| 2               | Fluid milk                  | Grain-based desserts        | Grain-based desserts            | Grain-based desserts           | Grain-based desserts           |
| 3               | Salty snacks                | Fluid milk                  | Fluid milk                      | Processed meats and poultry    | Fluid milk                     |
| 4               | Breads and rolls            | Processed meats and poultry | Processed meats and poultry     | Fluid milk                     | Tortilla and corn-based dishes |
| 5               | Processed meats and poultry | Breads and rolls            | Cheese & cheese products        | Tortilla and corn-based dishes | Processed meats and poultry    |
| 6               | Dairy-based desserts        | Cheese & cheese products    | Baby food, infant food, formula | Breads and rolls               | Cheese & cheese products       |
| 7               | Cheese & cheese products    | Soups & stews               | Breads and rolls                | Cheese & cheese products       | Breads and rolls               |
| 8               | Pizza & calzone             | Ready-to-eat cereals        | Ready-to-eat cereals            | Pizza & calzone                | Pizza & calzone                |
| 9               | Soups & stews               | Dairy-based desserts        | Dairy-based desserts            | Soups & stews                  | Sandwiches & filled rolls      |
| 10              | Ready-to-eat cereals        | Pizza & calzone             | Soups & stews                   | Dairy-based desserts           | Dairy-based desserts           |
| <b>Hispanic</b> |                             |                             |                                 |                                |                                |
| 1               | Fluid milk                  | Fluid milk                  | Fluid milk                      | Salty snacks                   | Salty snacks                   |
| 2               | Grain-based desserts        | Soups & stews               | Salty snacks                    | Grain-based desserts           | Grain-based desserts           |
| 3               | Breads and rolls            | Grain-based desserts        | Grain-based desserts            | Tortilla and corn-based dishes | Fluid milk                     |

|    |                                     |                                 |                                 |                             |                                |
|----|-------------------------------------|---------------------------------|---------------------------------|-----------------------------|--------------------------------|
| 4  | Ready-to-eat cereals                | Salty snacks                    | Baby food, infant food, formula | Fluid milk                  | Tortilla and corn-based dishes |
| 5  | Processed meats and poultry         | Ready-to-eat cereals            | Ready-to-eat cereals            | Processed meats and poultry | Processed meats and poultry    |
| 6  | Soups & stews                       | Processed meats and poultry     | Cheese & cheese products        | Breads and rolls            | Cheese & cheese products       |
| 7  | Salty snacks                        | Cheese & cheese products        | Processed meats and poultry     | Soups & stews               | Breads and rolls               |
| 8  | Cheese & cheese products            | Breads and rolls                | Soups & stews                   | Cheese & cheese products    | Pizza & calzone                |
| 9  | Dairy-based desserts                | Tortilla and corn-based dishes  | Tortilla and corn-based dishes  | Pizza & calzone             | Soups & stews                  |
| 10 | Nuts, nut butters, seeds, & coconut | Baby food, infant food, formula | Breads and rolls                | Ready-to-eat cereals        | Ready-to-eat cereals           |

**Non-Hispanic White**

|   |                             |                             |                             |                             |                                |
|---|-----------------------------|-----------------------------|-----------------------------|-----------------------------|--------------------------------|
| 1 | Grain-based desserts        | Salty snacks                | Salty snacks                | Salty snacks                | Salty snacks                   |
| 2 | Salty snacks                | Grain-based desserts        | Grain-based desserts        | Grain-based desserts        | Grain-based desserts           |
| 3 | Fluid milk                  | Fluid milk                  | Fluid milk                  | Fluid milk                  | Fluid milk                     |
| 4 | Processed meats and poultry | Processed meats and poultry | Cheese & cheese products    | Cheese & cheese products    | Processed meats and poultry    |
| 5 | Breads and rolls            | Cheese & cheese products    | Processed meats and poultry | Processed meats and poultry | Cheese & cheese products       |
| 6 | Dairy-based desserts        | Breads and rolls            | Breads and rolls            | Breads and rolls            | Tortilla and corn-based dishes |



|                           |                                     |                             |                                 |                                |                                |
|---------------------------|-------------------------------------|-----------------------------|---------------------------------|--------------------------------|--------------------------------|
| 7                         | Pizza & calzone                     | Soups & stews               | Baby food, infant food, formula | Pizza & calzone                | Breads and rolls               |
| 8                         | Cheese & cheese products            | Dairy-based desserts        | Dairy-based desserts            | Dairy-based desserts           | Dairy-based desserts           |
| 9                         | Soups & stews                       | Pizza & calzone             | Ready-to-eat cereals            | Tortilla and corn-based dishes | Candy                          |
| 10                        | Ready-to-eat cereals                | Ready-to-eat cereals        | Pizza & calzone                 | Candy                          | Sandwiches & filled rolls      |
| <b>Non-Hispanic Black</b> |                                     |                             |                                 |                                |                                |
| 1                         | Grain-based desserts                | Salty snacks                | Salty snacks                    | Salty snacks                   | Salty snacks                   |
| 2                         | Fluid milk                          | Grain-based desserts        | Grain-based desserts            | Grain-based desserts           | Grain-based desserts           |
| 3                         | Salty snacks                        | Fluid milk                  | Processed meats and poultry     | Processed meats and poultry    | Processed meats and poultry    |
| 4                         | Breads and rolls                    | Breads and rolls            | Fluid milk                      | Pizza & calzone                | Tortilla and corn-based dishes |
| 5                         | Processed meats and poultry         | Processed meats and poultry | Breads and rolls                | Breads and rolls               | Pizza & calzone                |
| 6                         | Sandwiches & filled rolls           | Cheese & cheese products    | Cheese & cheese products        | Cheese & cheese products       | Sandwiches & filled rolls      |
| 7                         | Dairy-based desserts                | Pasta, noodle dishes        | Baby food, infant food, formula | Tortilla and corn-based dishes | Breads and rolls               |
| 8                         | Nuts, nut butters, seeds, & coconut | Pizza & calzone             | Soups & stews                   | Fluid milk                     | Cheese & cheese products       |
| 9                         | Ready-to-eat cereals                | Soups & stews               | Sandwiches & filled rolls       | Soups & stews                  | Poultry                        |

Sugar sweetened  
beverages

Baby food, infant food,  
formula

Dairy-based desserts

Sugar sweetened  
beverages

Fluid milk

---

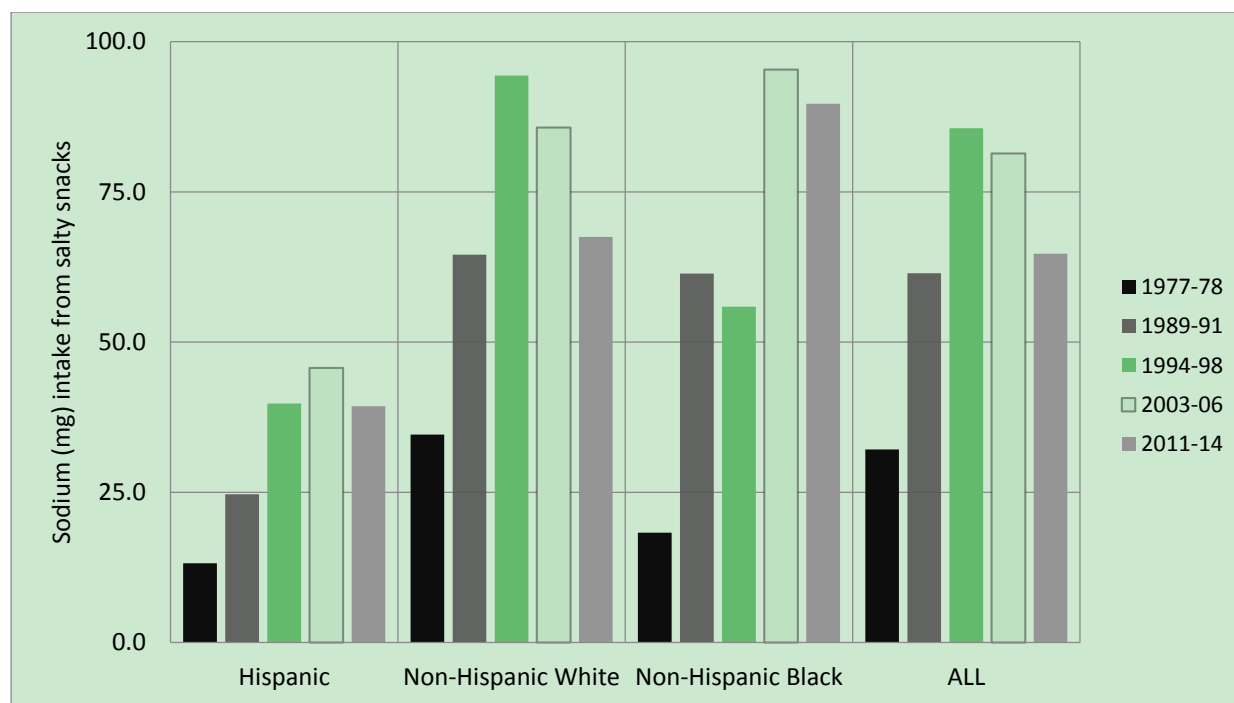

**Supplementary Figure 1: Contribution of salty snacks to sodium intake from snacking by race-ethnic group in US adults**

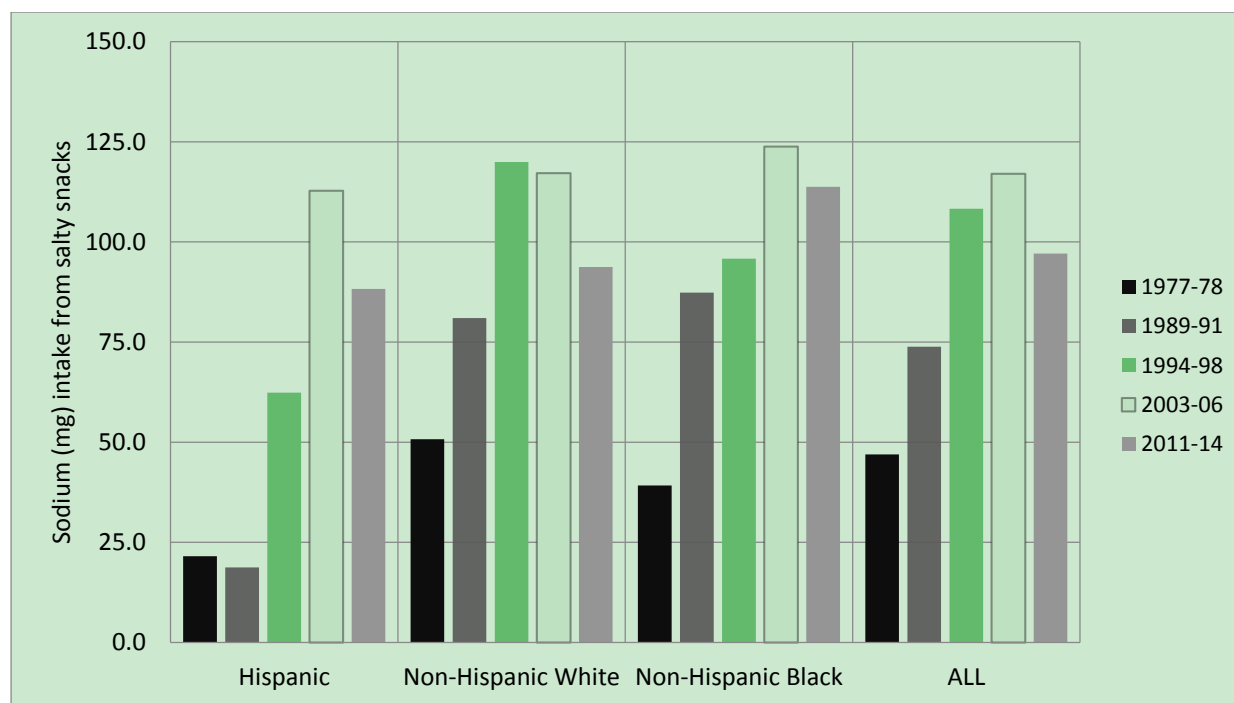

**Supplementary Figure 2: Contribution of salty snacks to sodium intake from snacking by race-ethnic group in US children**
